## The yeast endocytic protein Epsin 2 functions in a cell-division signaling pathway

Debarati Mukherjee, Brian G. Coon, Daniel F. Edwards, III, Claudia B. Hanna, Silvia A. Longhi, J. Michael McCaffery, Beverly Wendland, Lilia A. Retegui, Erfei Bi and R. Claudio Aguilar

*Journal of Cell Science* 122, 2782 (2009) doi:10.1242/jcs.057349

There was an error published in the ePress version of the article published in *J. Cell Sci.* **122**, 2453-2463.

The ePress version of this article wrongly gave the page numbers as 2454-2464.

We apologise for this mistake.
